# Supplementary material for: IMPAACT: IMproving the PArticipAtion of older people in policy decision-making on common health CondiTions – a study protocol
Source: PubMed Central journal article supplement — BMJ Open. 2024 Jan 12;14(1):e075501. doi: 10.1136/bmjopen-2023-075501 (PMC10806720; doi:10.1136/bmjopen-2023-075501), 2024-01-12
Supplement: bmjopen-2023-075501supp001.pdf [file bmjopen-2023-075501supp001.pdf]

### Screening Questions

1. What is your age group?

- Under 50
- 50 to 64
- 65 to 74
- 75 to 84
- 85+

---

IF Over 50, GO TO Q2

IF Under 50 Or Prefer Not to Answer, say 'Unfortunately you are outside the eligible age range for the study.' Then

GO TO STEP 3A (Exit script).

---

2. Have you ever worked as a GP or Practice Nurse in general practice?

- Yes
- No

---

IF No, GO TO Q3

IF Yes, say 'Unfortunately you are ineligible for the study.' Then

GO TO STEP 3A (Exit script).

---

3. What is the main language spoken in your home?

4. What is your country of birth?

4a. What is your gender?

- Male
- Female
- Non-binary
- Other (please specify)
- Prefer not to answer

---

4b. What suburb and postcode do you live in?

5. What is your household tenure type?

- \* Owns home outright
- \* Paying a mortgage
- \* Paying rent
- \* Living in someone else's household e.g. with son/daughter
- \* Other (specify)

---

6. What is your estimated yearly household income (in dollars) after tax?

- Under \$20,000
- \$20,001 – \$40,000
- \$40,001 – \$60,000
- \$60,001 – \$80,000
- \$80,001 – \$100,000
- \$100,001 or over
- Prefer not to answer

---

7. Have you been told by a doctor that you have any of the following conditions (identify which):

- Cardiac disease
- Stroke
- Obesity
- Chronic lung disease
- Arthritis
- Osteoporosis/osteopaenia
- Kidney disease
- Cancer
- Dementia or mild cognitive impairment

none

---

8a. What best describes your current employment status? Please tick one box only.

- Full time employed
- Part-time employed
- Unemployed
- Home duties
- Student/Training
- Retired
- Unable to work (e.g. Disability/WorkCover)
- I prefer not to answer

8b. Do you identify as frail?

- Yes
  - No
  - Unsure
- 

9. What is your sexual orientation?

- Heterosexual or straight
  - Gay
  - Lesbian
  - Bisexual
  - Pansexual
  - Other (please specify)
  - Prefer not to answer
- 

We have completed the telephone screening portion of our call.

- Do you have any questions?
- Do you think you would still like to take part in this research?

IF NO, GO TO STEP 3A

IF YES, GO TO STEP 5

---

We will now need to review your eligibility to participate in the study. This may take some time. We will call you within one week from today to let you know if you qualify to participate. At this time, if you are still interested in participating, we will send you a Participant Information sheet and Consent Form in the mail to fill out and send back to us. Participation is voluntary and participants may withdraw at any time.

If you have further questions about the study, please feel free to get in touch with our research team on this number or via the email address you have previously been given – do you need that again?

Thank-you for your time today. (End Call.)
